# Supplementary material for: Surgical trends and regional variation in Danish patients diagnosed with lumbar spinal stenosis between 2002 and 2018: a retrospective registry-based study of 83,783 patients
Source: Springer Nature journal article supplement (doi:10.1186/s12913-023-09638-7), 2023-06-20

## Additional file 1. Development in diagnosis and surgery rates of lumbar spinal stenosis stratified by age groups, sex, geographical region and comorbidity

Development in rates of LSS patients with and without surgery from 2002 to 2018 stratified by age groups

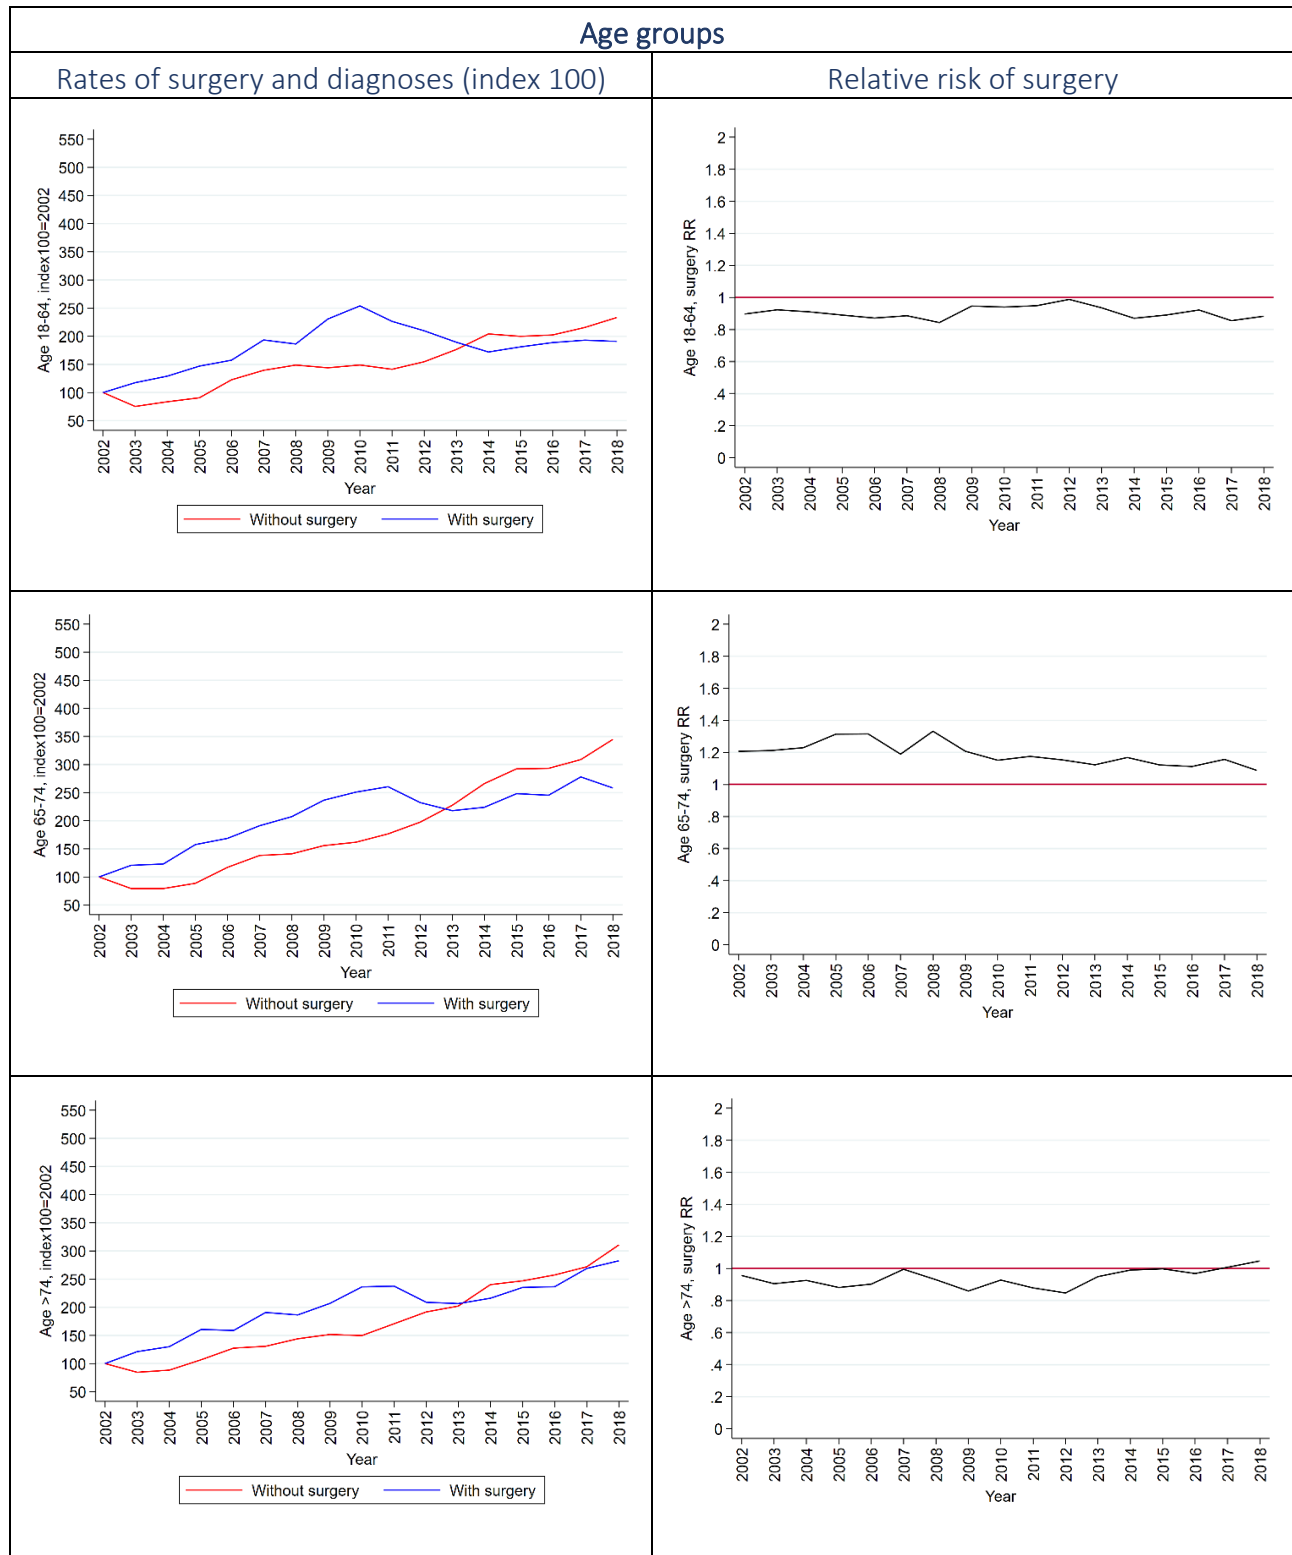

Development in rates of LSS patients with and without surgery from 2002 to 2018 stratified by sex

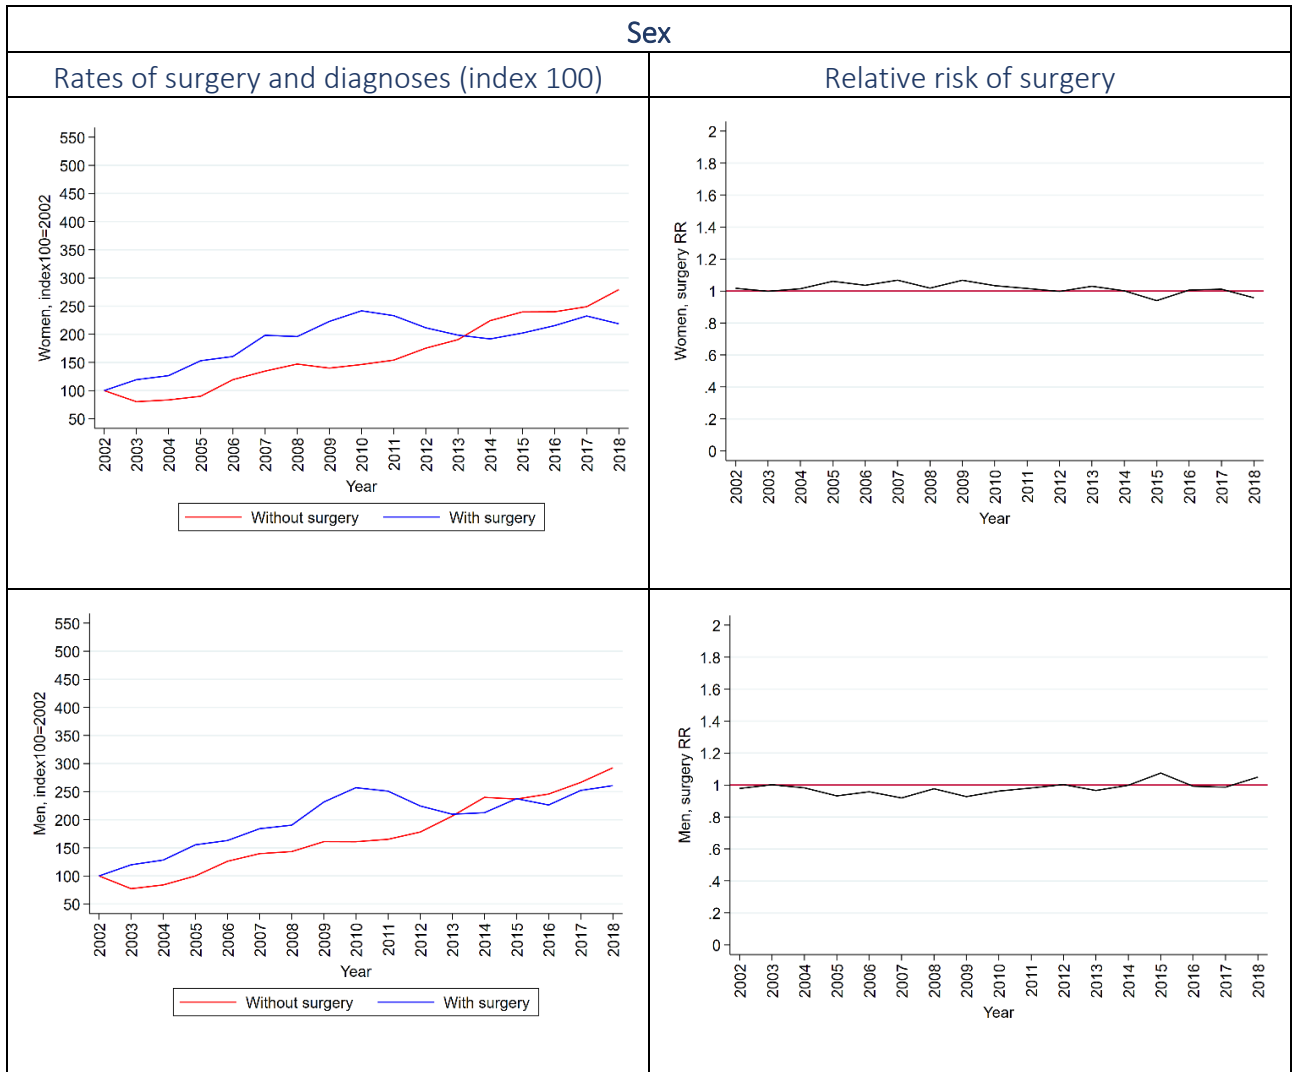

Development in rates of LSS patients with and without surgery from 2002 to 2018 stratified by geographical region

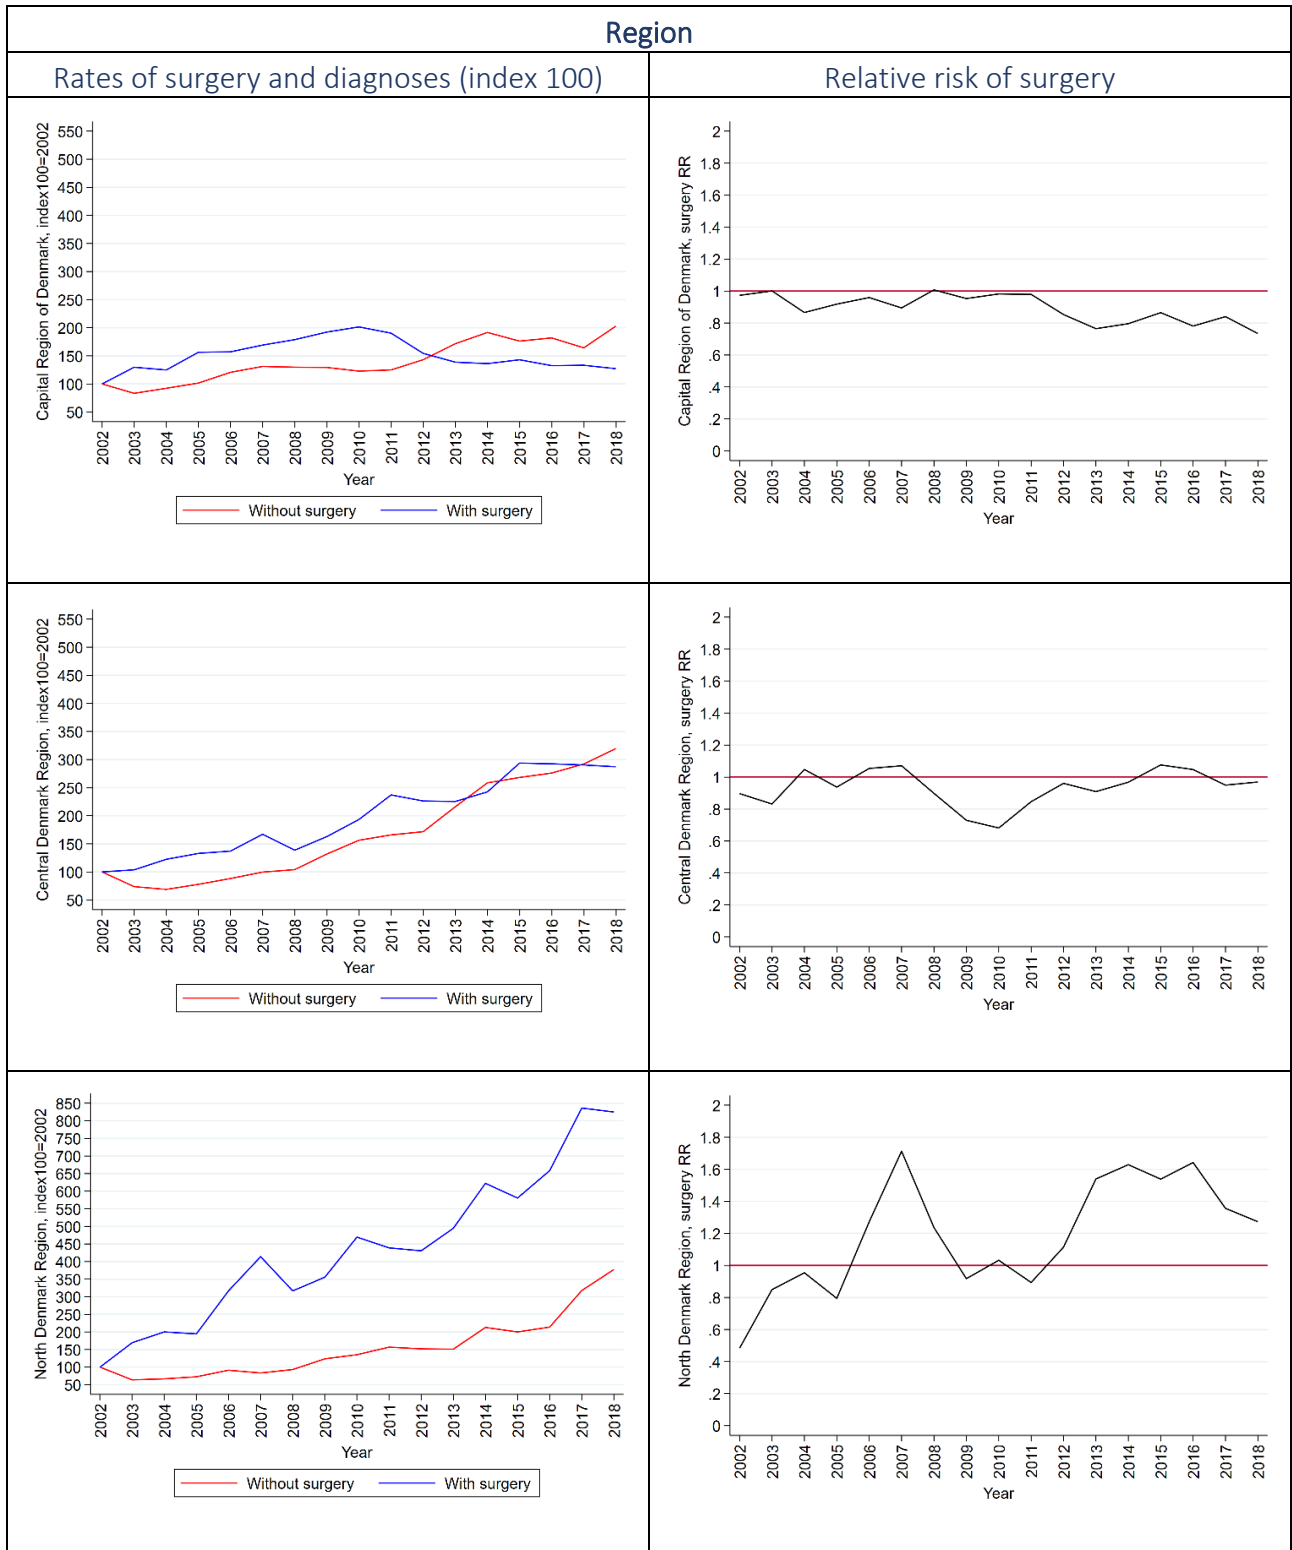

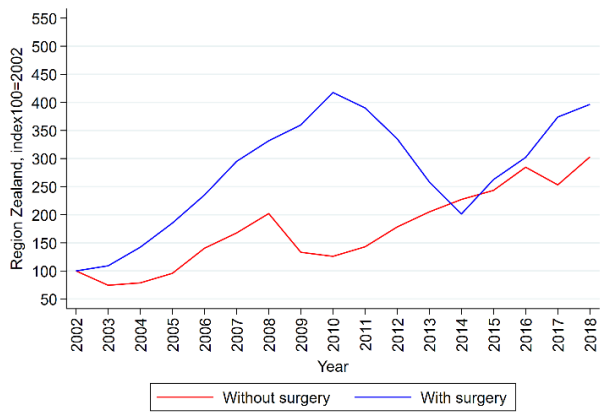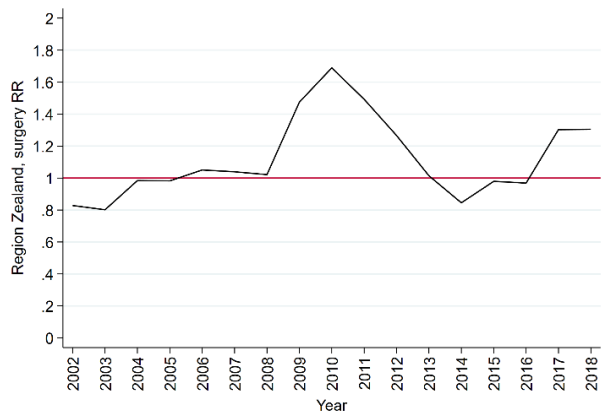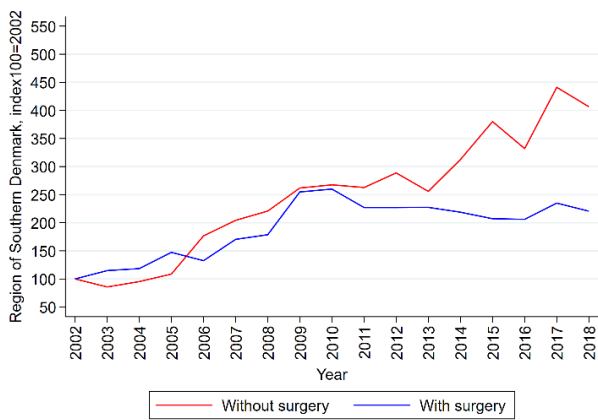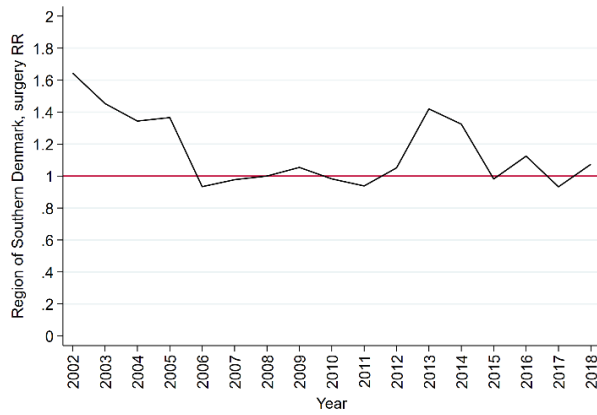

Development in rates of LSS patients with and without surgery from 2002 to 2018 stratified by comorbidity

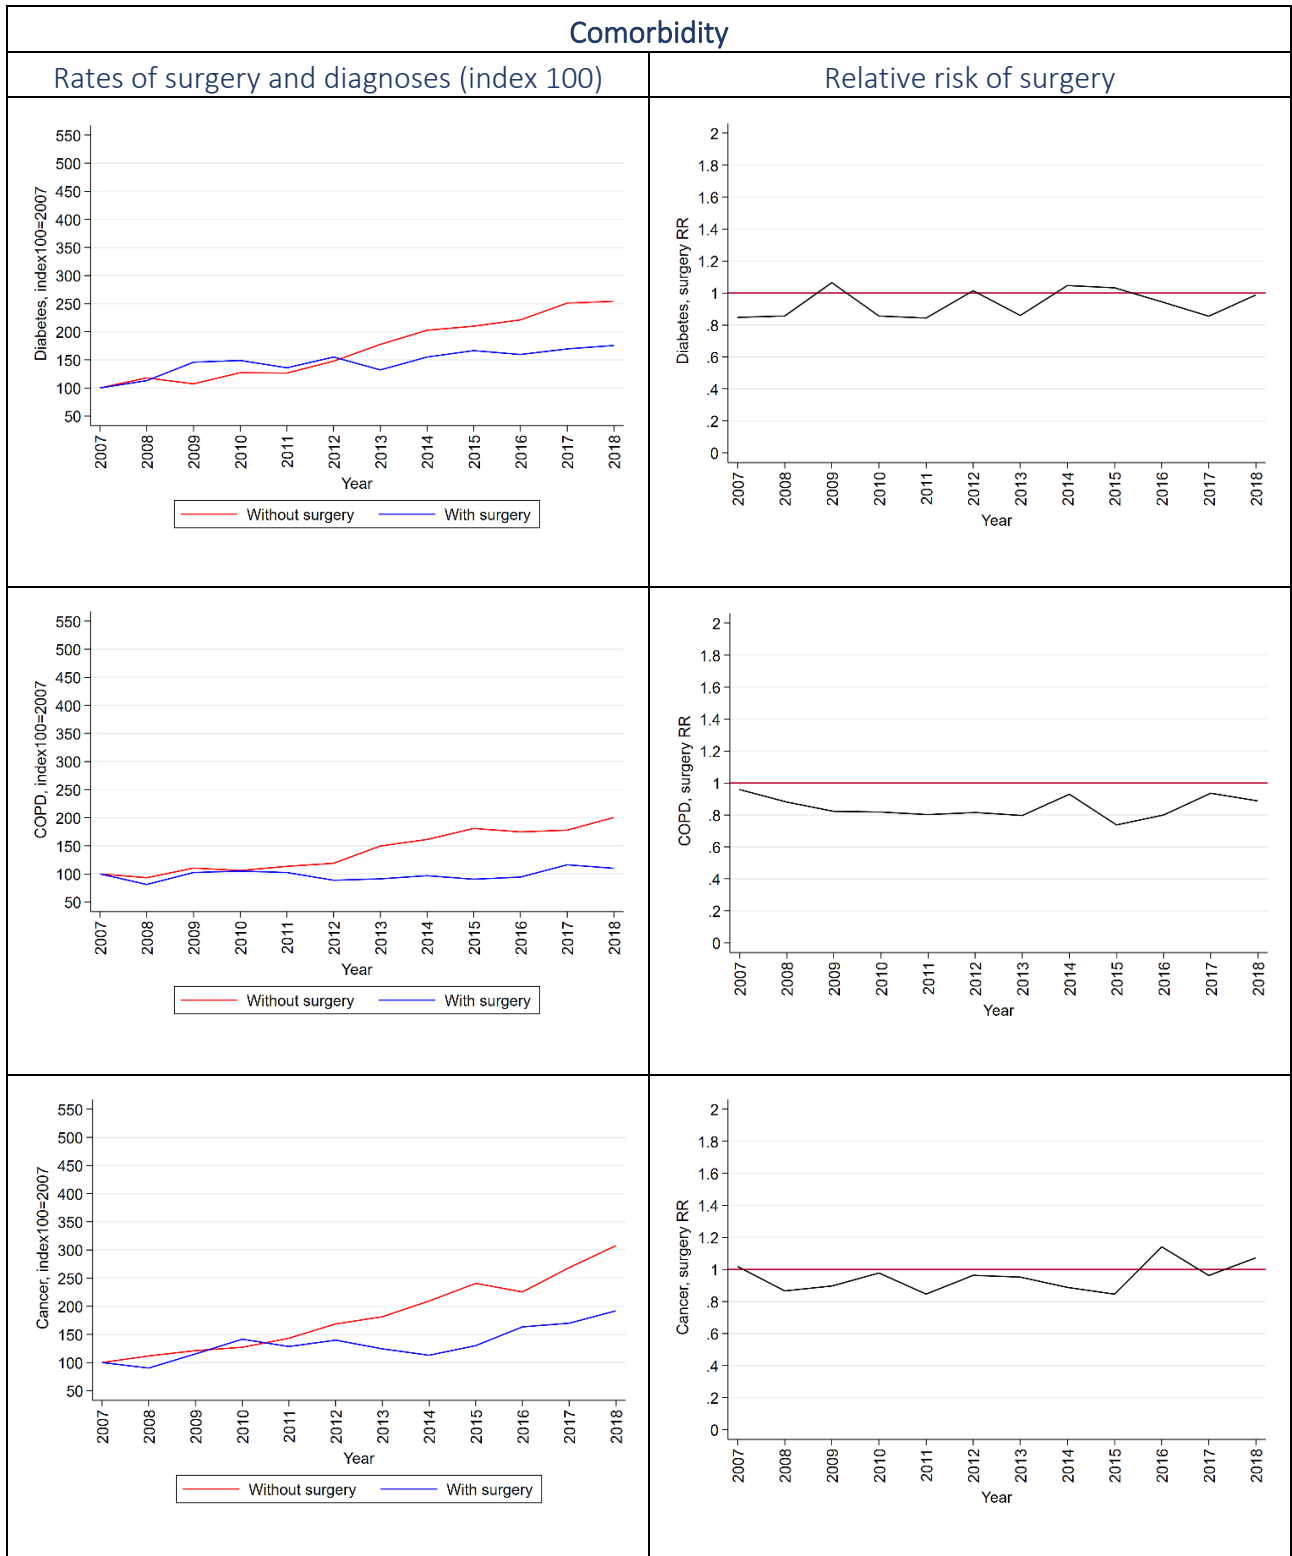

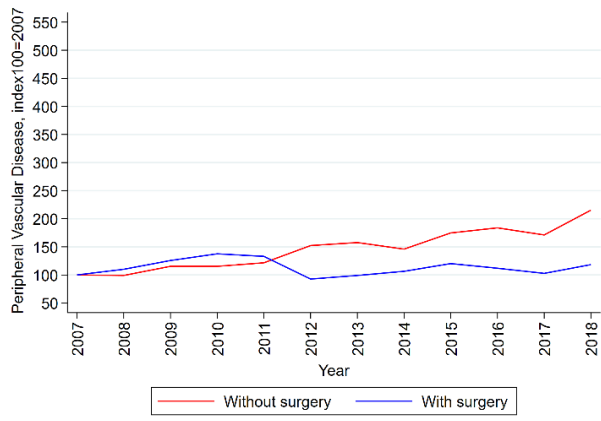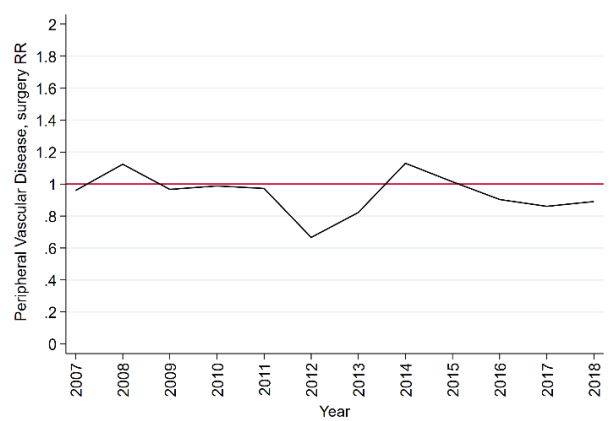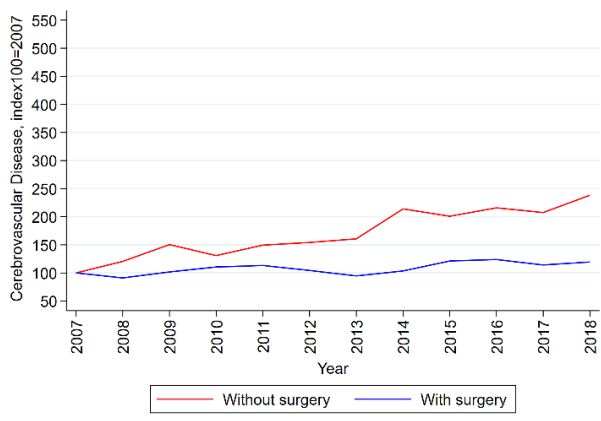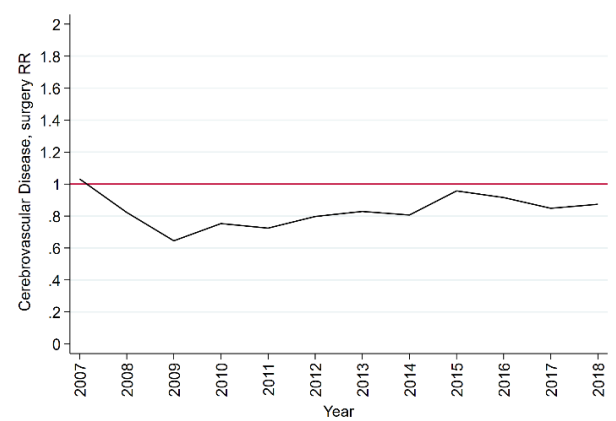

Development in number of LSS surgeries per 100,000 from 2002 to 2018 stratified by geographical region

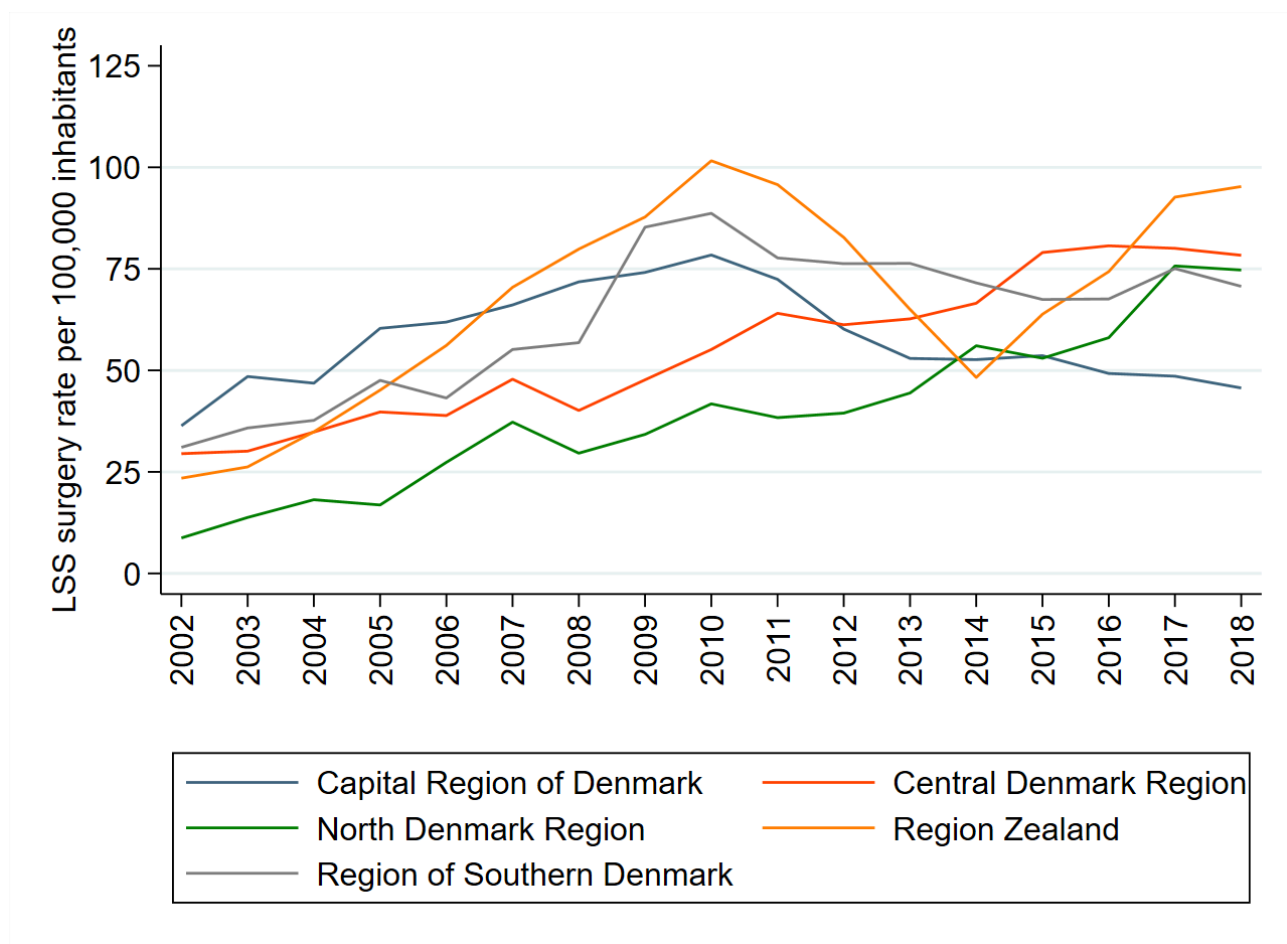

Supplement: MOESM1 [file 25516946]
